# Supplementary material for: Synthesis of biowaste-derived carbon-dot-mediated silver nanoparticles and the evaluation of electrochemical properties for supercapacitor electrodes
Source: publisher site journal article supplement (doi:10.3762/bjnano.16.71), 2025-06-24
Supplement: Additional file 1 [file 2190-4286-16-71-S1.pdf]

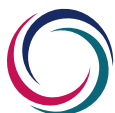

## Supporting Information

for

### **Synthesis of biowaste-derived carbon-dot-mediated silver nanoparticles and the evaluation of electrochemical properties for supercapacitor electrodes**

Navya Kumari Tenkayala, Chandan Kumar Maity, Md Moniruzzaman  
and Subramani Devaraju

*Beilstein J. Nanotechnol.* **2025**, *16*, 933–943. doi:10.3762/bjnano.16.71

**Experimental procedures including materials details and characterizations; Schematic representation; BET isotherm and pore size distribution plot; SEM, EDX, and elemental mapping of PG-CDs-AgNPs; ASC device fabrication method; Table for the comparison of cyclic stability**

## **S1. Experimental section**

### **Materials**

All the chemicals were used without further purification. Silver nitrate ( $\text{AgNO}_3$ ) was purchased from Sisco Research Laboratories, India. Dimethyl sulfoxide (DMSO, 99.5%), potassium chloride (KCl), tetraethylammonium tetrafluoroborate ( $\text{TEABF}_4$ , 99%), and ethanol were purchased from Sigma-Aldrich, India. Deionized (DI) water was used for all syntheses and experiments.

### **Preparation of *Pongamia pinnata* leaves powder**

Waste *Pongamia pinnata* leaves were collected from nearby places, washed with distilled water, and dried in the hot air oven at 70 °C. Then, using a mortar and pestle, the dried leaves were ground into fine powder and used for further processing.

### **Material characterization**

Using a Shimadzu UV 1800 spectrophotometer, the UV–visible absorption spectra of PG-CDs and PG-CDs-AgNPs were acquired. The PL emission spectra of PG-CDs and PG-CDs-AgNPs were taken using a spectrophotometer (RF 6000, Shimadzu, Japan). X-ray diffraction patterns of PG-CDs-AgNPs were measured using a powder X-ray diffractometer (Model-D8 Advance Bruker AXS powder XRD). At a degassing temperature of 60 °C for 4 h, BET analysis and pore size distribution of the samples were measured via  $\text{N}_2$  adsorption–desorption method using the Micromeritics' ASAP 200. A Thermo Fisher Scientific-MultiLab-2000, (monochromated Al  $\text{K}\alpha$  source) was used for the XPS analysis. A Hitachi's scanning electron microscope (SEM) (SU8600) was utilized to visualize the surface morphologies (operating

voltage: 5kV) and elemental mapping of Ag, C, and O. By using a JEOL JEM-ARM200F (operating voltage: 200kV), transmission electron microscopy (TEM) analysis was performed.

## Electrochemical characterization

For three-electrode analysis, cyclic voltammetry (CV), galvanostatic charging/discharging (GCD), and electrochemical impedance spectroscopy (EIS) were performed using 1 M aqueous (aq.) KCl as the electrolyte on a Biologic SP200 electrochemical workstation. Pt foil and Ag/AgCl were utilized as the counter and reference electrodes in the three-electrode configuration, while the electroactive materials (PG-CDs-AgNPs) [sample: carbon black: binder (Nafion) = 80:15: 5] were mounted on the flat surface of a graphite rod to fabricate the working electrode. For GCD and CV analyses in the aqueous electrolyte, a potential limit of 0.0–0.8 V was maintained to prevent the overpotential of H<sub>2</sub>O. The EIS study was carried out between 1 MHz and 1 Hz at room temperature. The gravimetric specific capacitance (SC) of PG-CDs-AgNPs was calculated applying the following equation [1]:

$$SC \text{ (F/g)} = \frac{i \times t}{m \times \Delta V} \quad (S1)$$

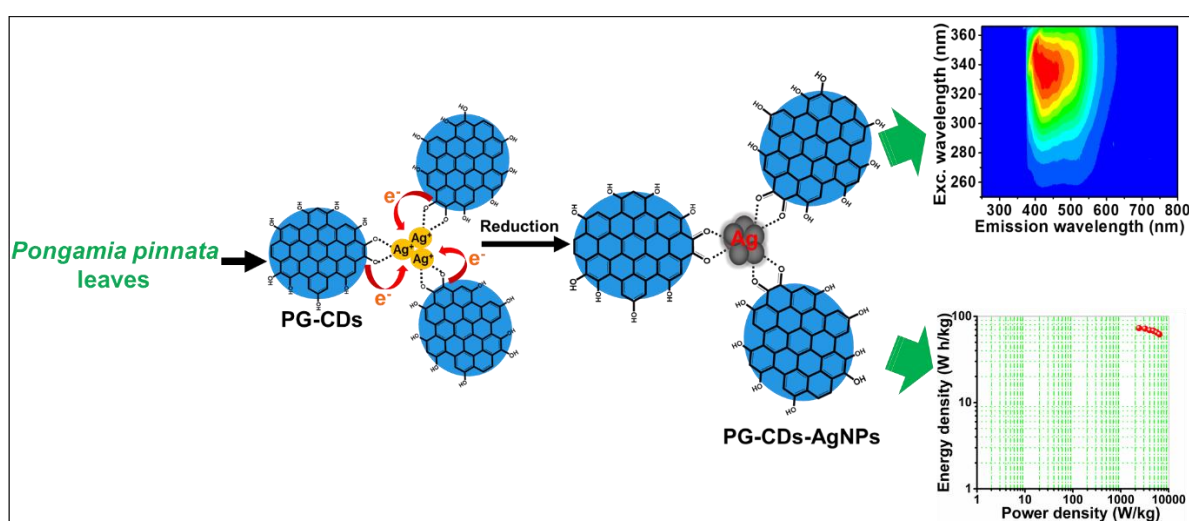

**Scheme S1:** Schematic representation of the overall methodology as well as the optical and electrochemical storage properties of PG-CDs-AgNPs.

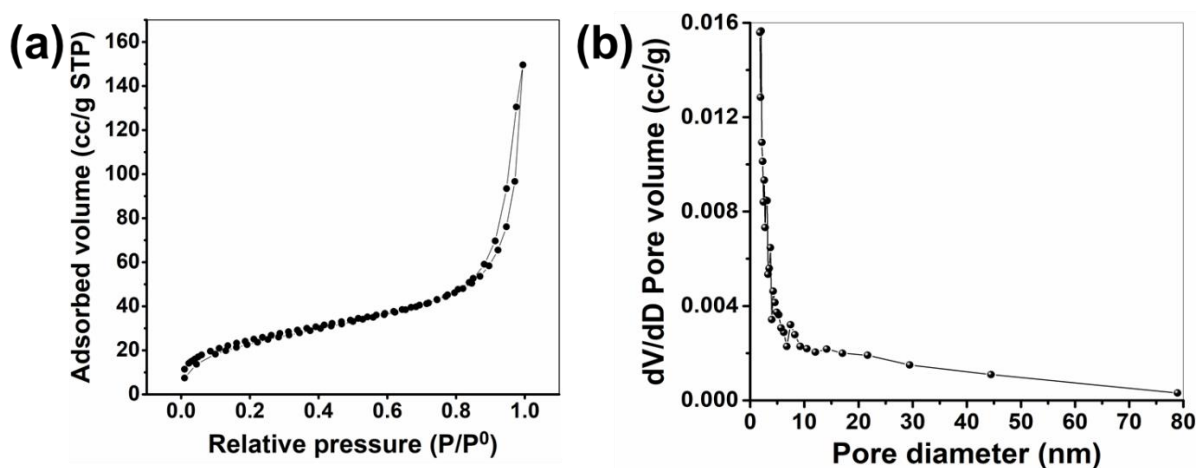

**Figure S1:** (a) BET isotherm and (b) pore size distribution plot of PG-CDs-AgNPs.

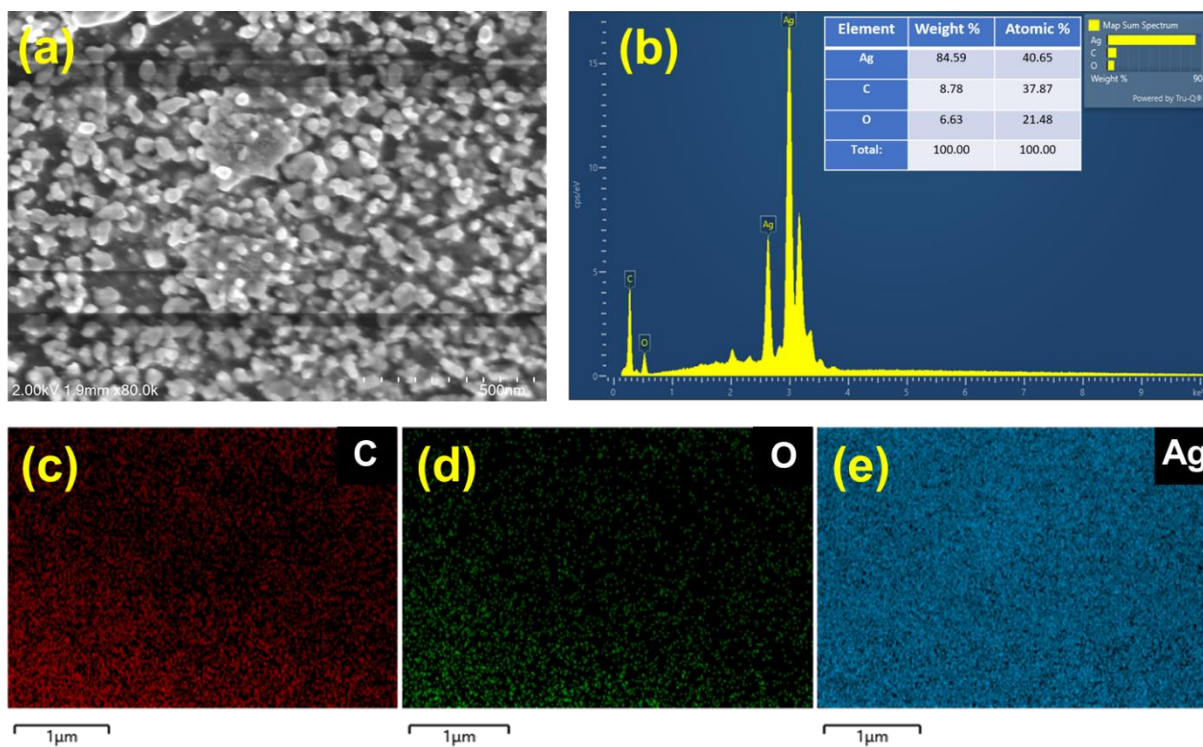

**Figure S2:** (a) SEM image of PG-CD-AgNPs, (b) EDX analysis of PG-CD-AgNPs, and (c-e) Elemental mapping of C, O, and Ag, respectively for PG-CD-AgNPs.

## S2. Asymmetric supercapacitor device fabrication method

For the fabrication of an asymmetric supercapacitor (ASC) device, PG-CD-AgNPs and carbon black (CB) were used as positive and negative electrodes, respectively; whereas tissue paper acted as the separator. In a manner similar to [2], the ASC device was fabricated. The electrochemical analyses of the supercapacitor device were conducted using an organic electrolyte [1M tetraethylammonium tetrafluoroborate (TEABF<sub>4</sub>)/ dimethyl sulfoxide (DMSO)] on a Biologic SP200 electrochemical workstation.

The gravimetric specific capacitance (SC) of the device was calculated applying the following equation [1]:

$$SC \text{ (F/g)} = \frac{2 \times i \times \Delta t}{m \times \Delta V} \quad (S2)$$

The specific energy density (ED) and power density (PD) of the ASC device were calculated using the following equation [1]:

$$ED \text{ (W h/kg)} = \frac{SC \times \Delta V^2}{7.2} \quad (S3)$$

$$PD \text{ (W/kg)} = \frac{ED \times 3600}{\Delta t} \quad (S4)$$

**Table S1:** Comparison of the cyclic stability of the PG-CDs-AgNPs nanohybrid (as the positive electrode used in ASC) with other similar electrodes.

| Electrode                          | Measurement type             | Cyclic stability               | Reference |
|------------------------------------|------------------------------|--------------------------------|-----------|
| Sn/SnO <sub>2</sub> /GQD/CNF       | As positive electrode in ASC | 86.1%<br>After 5000 cycles     | [3]       |
| Graphene oxide/CDs/<br>Polypyrrole | Symmetric<br>supercapacitor  | 92.9%<br>After 5000 cycles     | [4]       |
| AgNPs/Porous carbon                | As positive electrode in ASC | 82.7%<br>After 10000 cycles    | [5]       |
| NF/NiSe/MnO <sub>2</sub> -LCDs     | As positive electrode in ASC | 88.46%<br>After 7000 cycles    | [6]       |
| Ag QDs/NiMoO <sub>4</sub>          | As positive electrode in ASC | 84.4%<br>After 5000 cycles     | [7]       |
| Ag quantum dots/MoO <sub>3</sub>   | As positive electrode in ASC | 90%<br>After 5000 cycles       | [8]       |
| Pt-AgNPs/rGO                       | Symmetric<br>supercapacitor  | 70.65%<br>After 10000 cycles   | [9]       |
| Ag@Ti <sub>3</sub> C <sub>2</sub>  | As anode in ASC              | 91.27%<br>After 5000 cycles    | [10]      |
| Zn-MoS <sub>2</sub> /CDs@BN        | As positive electrode in ASC | 89%<br>After 10000 cycles      | [11]      |
| NiCo-LDH@CDs                       | As positive electrode in ASC | 78.6%<br>After 10000 cycles    | [12]      |
| CDs/Ni-Zn phosphates               | As positive electrode in ASC | 90.6%<br>After 10000<br>cycles | [13]      |
| <b>PG-CDs-AgNPs</b>                | As positive electrode in ASC | 87%<br>After 10000 cycles      | This work |

GQD: graphene quantum dot, CNF: carbon nanofiber, NF: nickel foam, LCDs: lignin-derived carbon dots, rGO: reduced graphene oxide, BN: boron nitride, and LDH: layered double hydroxide.

## References

1. Chuai, M.; Zhang, K.; Chen, X.; Tong, Y.; Zhang, H.; Zhang, M. *Chem. Eng. J.* **2020**, *381*, 122682. doi:10.1016/j.cej.2019.122682.
2. Maity, C. K.; De, S.; Acharya, S.; Siddiki, S. H.; Sahoo, S.; Verma, K.; Thakur, V. K.; Nayak, G. C. *J. Energy Storage* **2022**, *56*, 105928. doi:10.1016/j.est.2022.105928.
3. Li, Z.; Zhang, C.; Bu, J.; Zhang, L.; Cheng, L.; Wu, M. *Carbon* **2022**, *194*, 197–206. doi:10.1016/j.carbon.2022.03.079.
4. Zhang, X.; Wang, J.; Liu, J.; Wu, J.; Chen, H.; Bi, H. *Carbon* **2017**, *115*, 134–146. doi:10.1016/j.carbon.2017.01.005.
5. Wang, R.; Li, X.; Nie, Z.; Jing, Q.; Zhao, Y.; Song, H.; Wang, H. *J. Energy Storage*, **2022**, *51*, 104364. doi:10.1016/j.est.2022.104364.
6. Xie, X.; Xu, Y.; Liu, J.; Wang, D. Lv, T.; Yuan, F.; Zhang, Q. *ACS Appl. Mater. Interfaces* **2024**, *16*, 68157-68168. doi:10.1021/acsami.4c13282.
7. Zhang, X.; Li, Z.; Yu, Z.; Wei, L.; Guo, X. *Appl. Surf. Sci.* **2020**, *505*, 144513. doi:10.1016/j.apsusc.2019.144513.
8. Zhang, X.; Fu, Q.; Huang, H.; Wei, L.; Guo, X. *Small*, **2019**, *15*, 1805235. doi:10.1002/sml.201805235.
9. Punnakal, N.; Chandhana, J. P.; Nair, D.; Thomas, S. S.; Madhavan, A.; TG, S. B.; Vasu, S. P. *J. Power Sources* **2025**, *641*, 236819. doi:10.1016/j.jpowsour.2025.236819.
10. Alam, A.; Saeed, G.; Kim, K. W.; Kim, J. K.; Park, H. S.; Lim, S. *J. Energy Storage* **2023**, *72*, 108227. doi:10.1016/j.est.2023.108227.
11. Maity, C. K.; De, S.; Panigrahi, A.; Acharya, S.; Verma, K.; Kim, M. J.; Nayak, G. C. *Compos. B: Eng.* **2023**, *264*, 110887. doi:10.1016/j.compositesb.2023.110887.
12. Wang, S.; Deng, J.; Li, M.; Lin, J.; Luo, L.; Yuan, Z.; Zhang, W.; He, C.; Du, G.; Zhao, W. *Chem. Eng. J.* **2025**, *511*, 162275. doi:10.1016/j.compositesb.2023.110887.
13. Guo, M.; Wang, S.; Zhao, L.; Guo, Z. *Electrochim. Acta* **2018**, *292*, 299-308. doi:10.1016/j.electacta.2018.08.119.
